# Supplementary material
Source: Research Square preprint supplement (doi:10.21203/rs.3.rs-9743344/v1)
Supplement: Supplementary file 1 [file 810bd83ab6894005c745d365.docx]

**Table 1 Length- weight relationship of barb species collected during the present study**

| **Species** | **Collection Sites** | **Length (mm)** | **Weight (gms)** | **Regression Equation** | **r2** | **r** | **K** | **Growth Behaviour** |
| --- | --- | --- | --- | --- | --- | --- | --- | --- |
| **Mean± S.D (Range)** | | **Mean±S.D**  **(Range)** |
| ***P. sophore*** | Lotic (n=62) | 73.74± 6.50  (61.44-93.81) | 5.41± 1.68  (2.716- 11.071) | Y=3.10X- 1.97 | 0.81 | 0.90* | 1.00±0.14  (0.75- 1.61) | Positive allometric |
| Lentic (n=60) | 95.8± 11.235  (30.82-11.584) | 12.60±3.40  ( 6.797- 24.332) | Y=1.08X- 0.02 | 0.42 | 0.65* | 1.02±0.22  (0.642- 2.02) | Negative allometric |
| ***P. amphibius*** | Lotic (n=50) | 74.87± 6.56  (61.1- 91) | 5.72± 1.64  (3.16- 11.07) | Y=2.61x- 4.16 | 0.69 | 0.83* | 1.00±0.16  (0.66- 1.64) | Negative allometric |
| Lentic (n=50) | 97.92±7.23  (82.4- 115.84) | 13.255±3.371  (6.79-24.33) | Y=3.25x- 5.37 | 0.87 | 0.93* | 1.00±0.1  (0.77- 1.38) | Positive allometric |
| ***P. dorsalis*** | Lotic (n=29) | 76.75± 4.25  (70- 86) | 5.21± 0.90  (3.83- 7.263) | Y=2.83X- 4.63 | 0.85 | 0.92* | 1.00±0.07  (0.885- 1.16) | Negative allometric |
| Lentic (n=25) | 84.08± 9.81  (73- 107) | 7.97± 3.44  (4.65- 17.14) | Y=3.19X- 5.27 | 0.92 | 0.96* | 1.00±0.09  (0.77- 1.17) | Positive allometric |
| ***P. chola*** | Lotic (n=30) | 88.96± 10.845  (70- 118) | 9.50± 3.50  (4.21- 19.59) | Y=2.83X- 4.57 | 0.89 | 0.94* | 1.00±0.11  (0.81- 1.22) | Negative allometric |
| Lentic (n=24) | 64.87± 10.54  (45- 83) | 3.47± 1.71  (0.953- 7.256) | Y=3.15X- 5.21 | 0.97 | 0.98* | 1.00± 0.08  (0.75- 1.14) | Positive allometric |
| ***P. ticto*** | Lotic (n=31) | 52.89± 3.10  (46- 58) | 1.92± O.38  (1.18- 2.75) | Y=2.45X-3.80 | 0.83 | 0.91* | 1.00± 0.16  (0.79- 1.40) | Negative allometric |
| Lentic (n=56) | 53. 28± 2.99  (46- 58) | 2.87± 0.96  (1.19- 5.84) | Y= 3.34X-5.48 | 0.16 | 0.4 | 1.00± 0.28  (0.35- 1.75) | Positive allometric |
| ***P. conchonius*** | Lotic (n=31) | 56.02±9.83  (32.7- 79.3) | 3.334± 0.763  (1.12- 4.99) | Y= 1.37X-1.89 | 0.83 | 0.91* | 1.00±0.10  (0.68- 1.20) | Negative allometric |
| Lentic (n=44) | 53.13±3.20  (46- 58) | 2.678± 0.96  (1.19- 5.84) | Y=2.34X-3.63 | 0.14 | 0.38* | 1.06±0.37  (0.49- 1.28) | Negative allometric |
