# Supplementary material
Source: Research Square preprint supplement (doi:10.21203/rs.3.rs-9743344/v1)
Supplement: Supplementary file 2 [file 886c28cd2bfee179faf82fda.docx]

| Species | Habitat | N | Mean OW | Mean CW | Mean deviation | P(T<=t) two-tail value |
| --- | --- | --- | --- | --- | --- | --- |
| *P. sophore* | Lotic | 62 | 5.411 | 5.365 | 0.009 | 3.26963E-50 |
| Lentic | 60 | 12.604 | 12.298 | 0.024 |
| *P.amphibius* | Lotic | 50 | 5.728 | 5.659 | 0.012 | 6.3441E-53 |
| Lentic | 50 | 13.255 | 13.197 | 0.004 |
| *P. dorsalis* | Lotic | 29 | 5.217 | 5.206 | 0.002 | 8.62051E-10 |
| Lentic | 25 | 7.978 | 7.936 | 0.005 |
| *P.chola* | Lotic | 30 | 9.505 | 9.478 | 0.002 | 2.78039E-38 |
| Lentic | 24 | 3.472 | 3.471 | 0 |
| *P.ticto* | Lotic | 31 | 1.987 | 1.981 | 0.003 | 8.47664E-32 |
| Lentic | 56 | 2.871 | 3.336 | -0.139 |
| *P.conchonius* | Lotic | 31 | 3.334 | 3.326 | 0.002 | 1.43005E-23 |
| Lentic | 44 | 2.678 | 2.534 | 0.057 |

**Table 2** Relative Condition Factor (Kn) of sampled fish species in two habitats: N: Sample size of collected samples, OW: Observed Weight (g), CW: CalculatedWeight (g), Mean Kn value, The t-test significance: the statistical significance of the t-test (P < 0.05) performed to deduce if there is significant difference between mean Kn in lotic and lentic habitat
